# Supplementary material for: Bimetallic nanozyme of Cu–Mn organophyllosilicate with enhanced multi-enzyme mimetic activity for simultaneous degradation of hydroquinone and methylene blue
Source: Royal Society of Chemistry journal article supplement (doi:10.1039/d4en00692e), 2024-01-01
Supplement: d4en00692e1.pdf [file d4en00692e1.pdf]

## **Bimetallic nanozyme of Cu-Mn organophyllosilicate with enhanced multi-enzyme mimetic activity for simultaneous degradation of hydroquinone and methylene blue**

Rui Lv<sup>1</sup>, Beibei He<sup>2</sup>, Shiyong Sun<sup>2\*</sup>, Ke Wang<sup>2</sup>, Sen Lin<sup>2</sup>, Elena Leonidovna Kotova<sup>3</sup>,

Jin Liu<sup>2</sup>, Haoming Tang<sup>2</sup>

1 School of Chemistry and Chemical Engineering, Mianyang Teachers' College,

Mianyang, Sichuan, 621000, China

2 School of Environment and Resource, Key Laboratory of Solid Waste Treatment

and Resource Recycle of Ministry of Education, Southwest University of Science and

Technology, Mianyang, Sichuan, 621010, China

3 Saint-Petersburg Mining University, 21st Line, St. Petersburg, 199106, Russia

\*Corresponding Author: [shysun@swust.edu.cn](mailto:shysun@swust.edu.cn)

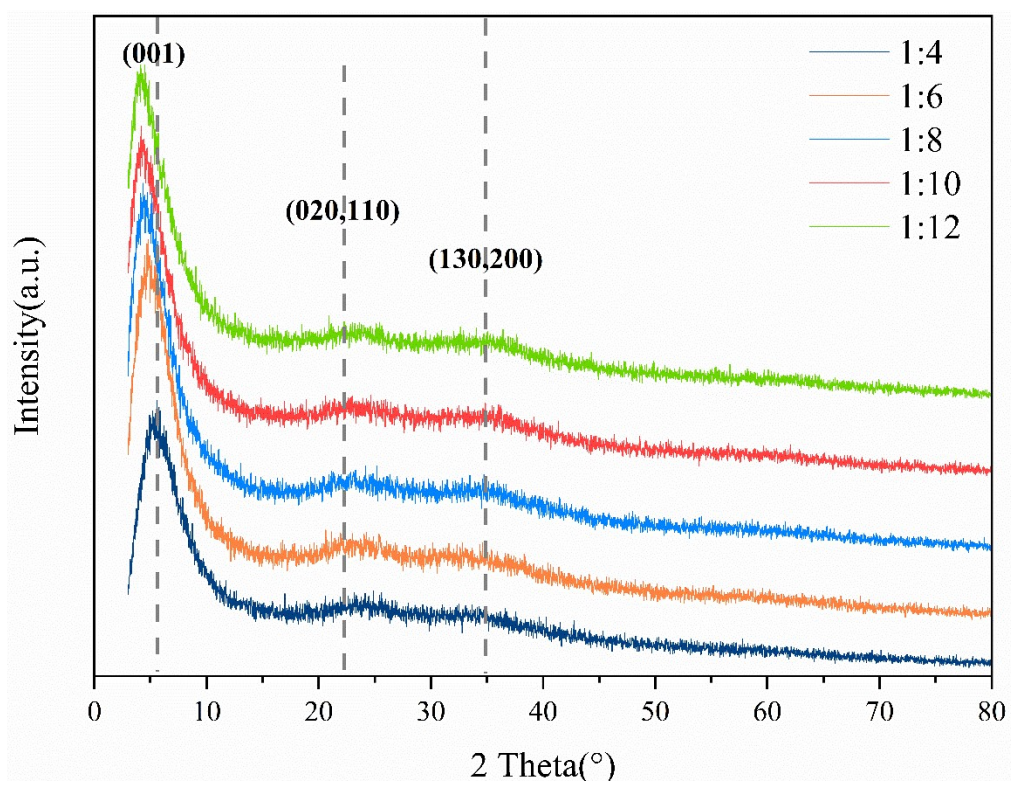

**Figure S1.** The XRD patterns of different ratio of amino and carboxyl group

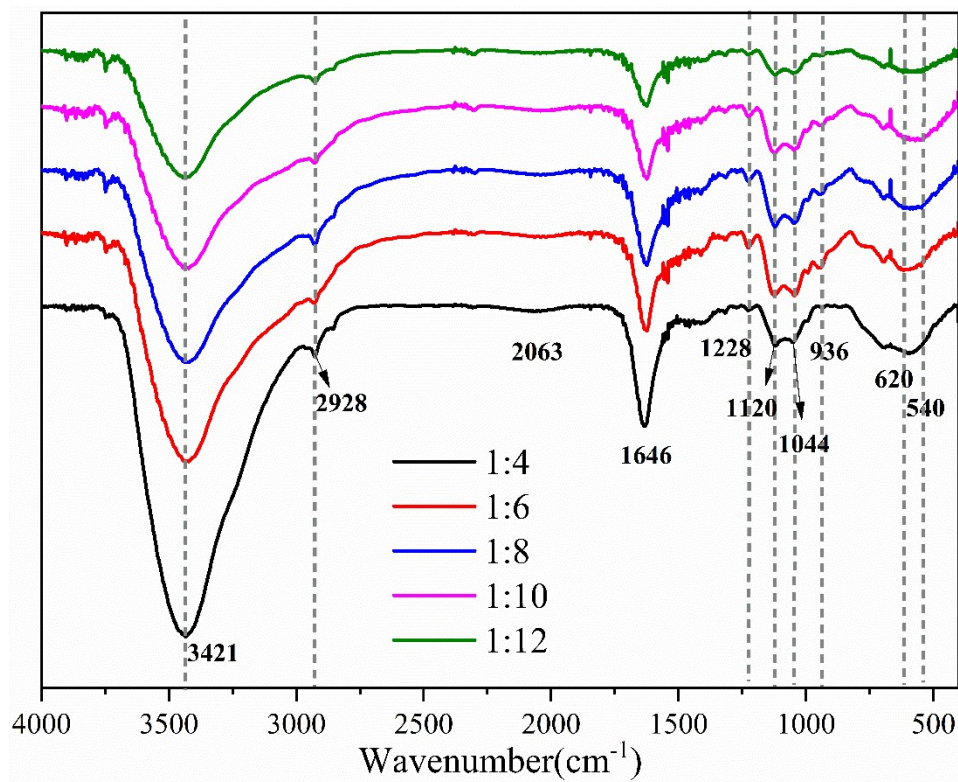

**Figure S2.** The FTIR spectra of different ratio of amino and carboxyl group

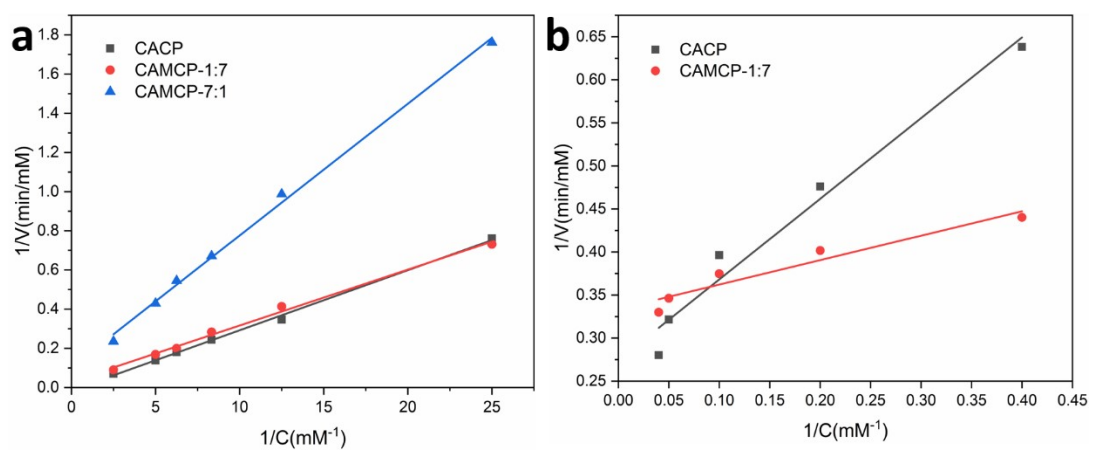

**Figure S3.** Lineweaver-Burk curve for determination the kinetic constants. Different

Mn/Cu molar ratio of CAMCP for (a) TMB and (b) H<sub>2</sub>O<sub>2</sub> substrate;

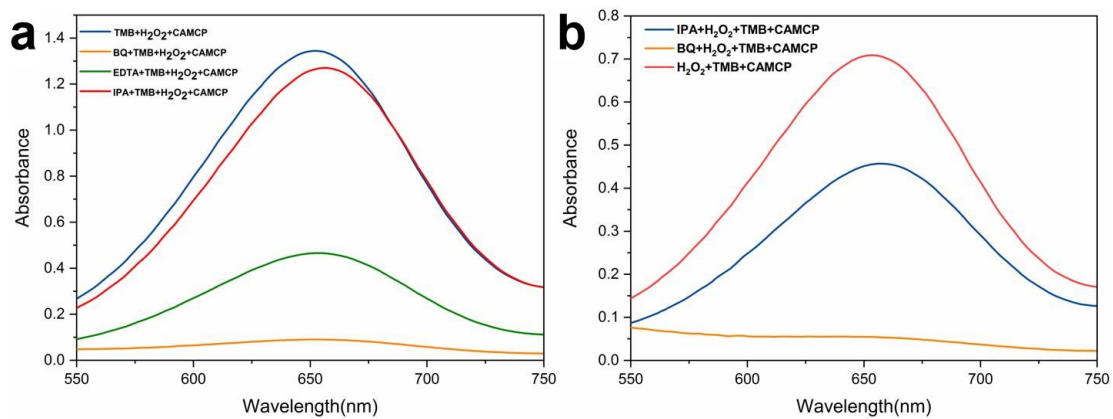

**Figure S4.** ROS produced in the enzyme-like reactions. a: OXD-like reaction; b:

POD-like reaction

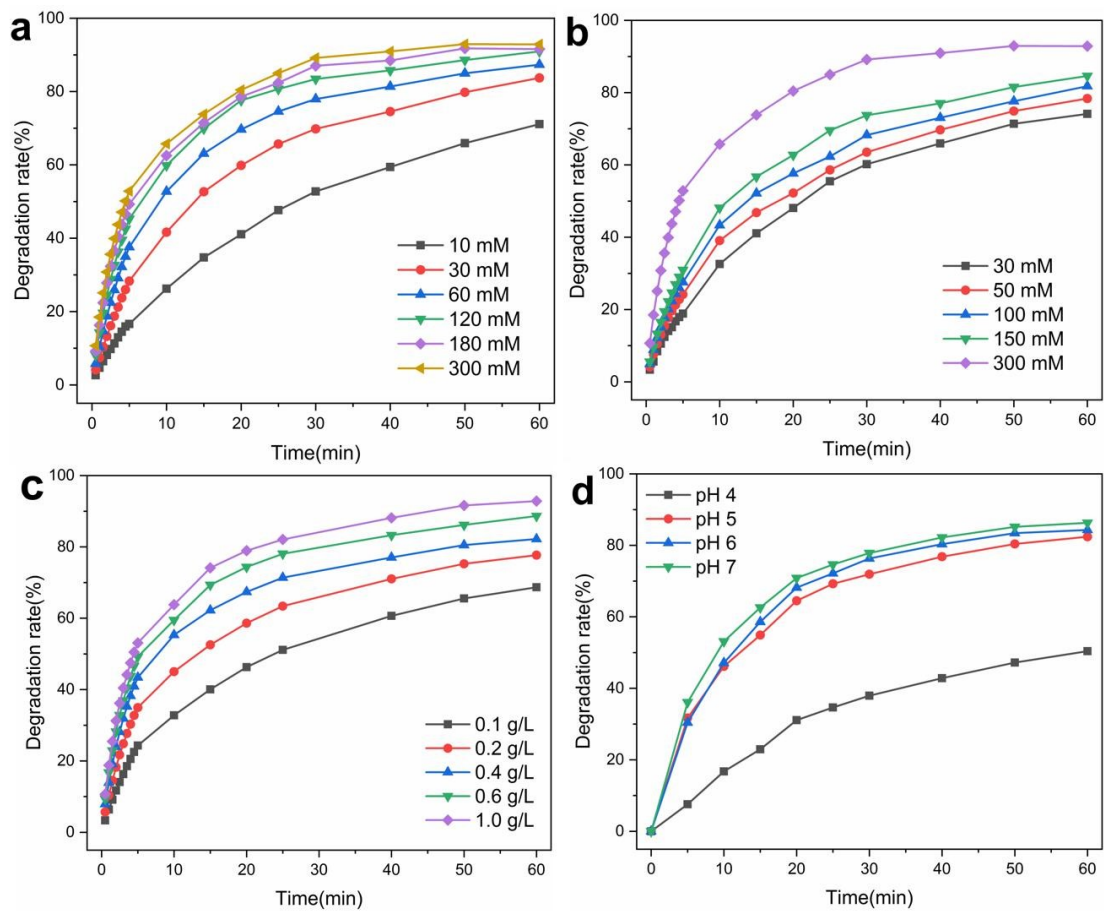

**Figure S5.** The effect of different factors for the decolorization of MB. a: concentration of H<sub>2</sub>O<sub>2</sub>; b: concentration of HQ; c: concentration of CAMCP; d: pH.
